# Supplementary material for: Exploration of Immune-Related Gene Expression in Osteosarcoma and Association With Outcomes
Source: PubMed Central journal article supplement (PMC8335580; doi:10.1001/jamanetworkopen.2021.19132), 2021-08-03
Supplement: jamanetwopen-e2119132-s001.pdf [file jamanetwopen-e2119132-s001.pdf]

## Supplemental Online Content

Liu W, Xie X, Qi Y, Wu J. Exploration of immune-related gene expression in osteosarcoma and association with outcomes. *JAMA Netw Open*. 2021;4(8):e2119132. doi:10.1001/jamanetworkopen.2021.19132

**eTable 1.** Clinicopathological Characteristics of the Patients

**eTable 2.** DEGs Between the High- and Low-Risk Groups

**eTable 3.** Top 10 Most Significant Terms in GO Enrichment Analyses

**eFigure 1.** Overall Survival According to the Risk Score in Patients With Osteosarcoma

**eFigure 2.** Volcano Plot and Heatmap of DEGs Between Groups

**eFigure 3.** KEGG Pathway Enrichment Analyses: the Enriched KEGG Signaling Pathways From the DEGs

**eFigure 4.** TFs and IRGs Associations

This supplemental material has been provided by the authors to give readers additional information about their work.

**eTable 1.** Clinicopathological Characteristics of the Patients

| <b>Variables</b>        | <b>Low risk group,<br/>n=42</b> | <b>High risk group,<br/>n=42</b> | <b>P</b> |
|-------------------------|---------------------------------|----------------------------------|----------|
| Age (years)             | 15.02±4.84                      | 14.93±4.78                       | 0.930    |
| Gender                  |                                 |                                  | 0.183    |
| Female                  | 15 (35.7%)                      | 22 (52.4%)                       |          |
| Male                    | 27 (64.3%)                      | 20 (47.6%)                       |          |
| Metastases at diagnosis |                                 |                                  | 0.011    |
| Presence                | 5 (11.9%)                       | 16 (38.1%)                       |          |
| Absence                 | 37 (88.1%)                      | 26 (61.9%)                       |          |
| Primary site            |                                 |                                  | 0.125    |
| Femur                   | 15 (35.7%)                      | 23 (54.8%)                       |          |
| Other site              | 27 (64.3%)                      | 19 (45.2%)                       |          |
| Survival state          |                                 |                                  |          |
| Live                    | 41 (97.6%)                      | 16 (38.1%)                       |          |
| Dead                    | 1 (2.4%)                        | 26 (61.9%)                       | <0.001   |

**eTable 2.** DEGs Between the High- and Low-Risk Groups

| Gene symbol | Low risk<br>(Mean of log<br>2(RPKM)) | High risk<br>(Mean of log<br>2(RPKM)) | logFC  | P Value   | FDR   |
|-------------|--------------------------------------|---------------------------------------|--------|-----------|-------|
| MIR4768     | 3.981                                | -0.074                                | -4.055 | 0.0004128 | 0.032 |
| CSAG1       | 2.259                                | -1.681                                | -3.940 | 0.0003805 | 0.031 |
| MIR135A1    | 2.193                                | -1.740                                | -3.934 | 0.0001728 | 0.023 |
| MAGEA3      | 3.153                                | -0.756                                | -3.909 | 0.0007723 | 0.042 |
| PAGE5       | 2.843                                | -0.905                                | -3.747 | 0.0011018 | 0.047 |
| MAGEA12     | 1.406                                | -2.233                                | -3.638 | 0.0006961 | 0.040 |
| SSX1        | 2.749                                | -0.578                                | -3.327 | 0.0009114 | 0.044 |
| LINC01522   | -1.982                               | -5.229                                | -3.247 | 6.04E-05  | 0.016 |
| LINC02104   | 1.136                                | -2.104                                | -3.240 | 3.52E-06  | 0.007 |
| MAGEB2      | -0.535                               | -3.652                                | -3.117 | 0.000583  | 0.037 |
| MYL1        | 0.567                                | -2.463                                | -3.030 | 0.000234  | 0.027 |
| MAGEA11     | -0.880                               | -3.791                                | -2.911 | 0.0001176 | 0.020 |
| STRA8       | -0.443                               | -3.353                                | -2.910 | 3.29E-05  | 0.013 |
| COX7B2      | -1.658                               | -4.236                                | -2.579 | 0.0006707 | 0.039 |
| MAGEC1      | -1.992                               | -4.552                                | -2.560 | 0.0011169 | 0.047 |
| LINC00626   | 2.055                                | -0.485                                | -2.540 | 0.0002908 | 0.029 |
| XCL2        | 0.699                                | -1.821                                | -2.520 | 0.0001773 | 0.023 |
| SMPX        | -2.188                               | -4.645                                | -2.457 | 0.0006359 | 0.038 |
| LINC02234   | -2.431                               | -4.882                                | -2.452 | 0.0001499 | 0.023 |
| IPLL5       | -1.098                               | -3.523                                | -2.425 | 0.0007493 | 0.041 |
| C5orf46     | -1.638                               | -4.046                                | -2.408 | 0.0009228 | 0.044 |
| XAGE5       | -2.762                               | -5.169                                | -2.408 | 0.0011044 | 0.047 |
| CCL8        | 1.747                                | -0.607                                | -2.354 | 1.72E-05  | 0.009 |
| RSPO3       | 0.181                                | -2.117                                | -2.298 | 0.0002163 | 0.026 |
| C11orf91    | -2.093                               | -4.299                                | -2.207 | 8.58E-05  | 0.018 |
| PF4         | 1.515                                | -0.633                                | -2.148 | 0.0006938 | 0.040 |
| ACTG2       | 1.237                                | -0.870                                | -2.106 | 7.43E-05  | 0.017 |
| MSC         | 4.074                                | 2.005                                 | -2.069 | 6.61E-06  | 0.008 |
| FMO3        | -0.191                               | -2.231                                | -2.040 | 5.21E-06  | 0.008 |
| LINC01234   | -2.195                               | -4.207                                | -2.012 | 0.0003111 | 0.029 |
| MIR3945HG   | -1.260                               | -3.260                                | -2.000 | 0.0006141 | 0.038 |
| CXCL11      | 0.599                                | -1.386                                | -1.985 | 0.0005271 | 0.036 |
| APOBEC3H    | -1.504                               | -3.467                                | -1.962 | 0.0006154 | 0.038 |
| LINC01444   | -2.989                               | -4.950                                | -1.961 | 0.0012384 | 0.050 |
| HGF         | -0.116                               | -2.049                                | -1.932 | 8.36E-06  | 0.008 |
| LARS2-AS1   | -2.180                               | -4.095                                | -1.914 | 0.0009172 | 0.044 |
| GJA5        | 1.809                                | -0.087                                | -1.896 | 2.90E-06  | 0.007 |
| AGMO        | -1.258                               | -3.144                                | -1.886 | 0.0001568 | 0.023 |
| ST6GAL2     | -0.340                               | -2.225                                | -1.884 | 0.0011073 | 0.047 |

| Gene symbol | Low risk<br>(Mean of log<br>2(RPKM)) | High risk<br>(Mean of log<br>2(RPKM)) | logFC  | P Value   | FDR   |
|-------------|--------------------------------------|---------------------------------------|--------|-----------|-------|
| IL2RA       | -0.909                               | -2.793                                | -1.884 | 5.46E-06  | 0.008 |
| GBP1P1      | -0.835                               | -2.706                                | -1.872 | 0.0003952 | 0.031 |
| VSIG4       | 3.942                                | 2.077                                 | -1.865 | 3.05E-06  | 0.007 |
| FPR1        | 1.296                                | -0.550                                | -1.846 | 6.19E-07  | 0.007 |
| LINC01678   | -0.521                               | -2.352                                | -1.831 | 0.0001906 | 0.024 |
| HRCT1       | 2.660                                | 0.833                                 | -1.827 | 0.0001778 | 0.023 |
| VCAM1       | 2.478                                | 0.653                                 | -1.825 | 1.99E-05  | 0.009 |
| TMIGD2      | -2.132                               | -3.954                                | -1.822 | 0.0003461 | 0.030 |
| MYOSLID     | 0.467                                | -1.336                                | -1.803 | 0.0003283 | 0.029 |
| CD2         | 1.160                                | -0.624                                | -1.783 | 0.0001303 | 0.021 |
| BBOX1       | -0.931                               | -2.686                                | -1.755 | 0.0004024 | 0.031 |
| SBSN        | -2.440                               | -4.184                                | -1.744 | 0.000556  | 0.036 |
| LINC02262   | -3.772                               | -5.509                                | -1.737 | 0.0009221 | 0.044 |
| CPA4        | -2.075                               | -3.809                                | -1.734 | 0.0010052 | 0.046 |
| CCL2        | 2.980                                | 1.263                                 | -1.716 | 3.65E-05  | 0.013 |
| ACTN1-AS1   | -0.119                               | -1.831                                | -1.711 | 0.0003225 | 0.029 |
| LURAP1L     | 1.297                                | -0.407                                | -1.704 | 3.81E-05  | 0.013 |
| C1orf194    | -1.505                               | -3.203                                | -1.698 | 0.0006416 | 0.038 |
| LINC00525   | -2.545                               | -4.213                                | -1.667 | 0.00053   | 0.036 |
| C1QA        | 7.753                                | 6.095                                 | -1.658 | 3.81E-05  | 0.013 |
| C1QC        | 8.135                                | 6.485                                 | -1.651 | 1.21E-05  | 0.008 |
| JPH2        | -0.371                               | -2.022                                | -1.651 | 1.01E-05  | 0.008 |
| F13A1       | 2.985                                | 1.337                                 | -1.648 | 9.11E-05  | 0.018 |
| ACTA2       | 5.565                                | 3.919                                 | -1.646 | 4.15E-05  | 0.013 |
| C1QB        | 7.203                                | 5.573                                 | -1.630 | 2.27E-05  | 0.010 |
| GZMB        | 1.183                                | -0.438                                | -1.621 | 0.0010425 | 0.046 |
| CD3E        | 0.421                                | -1.189                                | -1.611 | 0.0001646 | 0.023 |
| MMP8        | -2.627                               | -4.235                                | -1.608 | 0.0003437 | 0.030 |
| SIGLEC14    | 0.524                                | -1.083                                | -1.607 | 0.0002278 | 0.027 |
| IL33        | -2.141                               | -3.745                                | -1.604 | 0.0011681 | 0.048 |
| SIT1        | 0.050                                | -1.548                                | -1.598 | 2.32E-05  | 0.010 |
| BBOX1-AS1   | 0.455                                | -1.129                                | -1.585 | 0.0010593 | 0.046 |
| CCIN        | -1.731                               | -3.315                                | -1.584 | 9.38E-05  | 0.018 |
| CTF1        | 0.908                                | -0.671                                | -1.579 | 0.0003247 | 0.029 |
| FMO2        | -2.921                               | -4.500                                | -1.579 | 0.0004919 | 0.035 |
| P2RY10      | -2.160                               | -3.739                                | -1.579 | 0.0004294 | 0.032 |
| KLRB1       | 0.200                                | -1.373                                | -1.573 | 0.0003172 | 0.029 |
| GBP1        | 3.219                                | 1.658                                 | -1.561 | 1.01E-05  | 0.008 |
| IL10        | -0.641                               | -2.200                                | -1.559 | 9.17E-06  | 0.008 |
| NCF1B       | 0.179                                | -1.374                                | -1.553 | 2.47E-05  | 0.010 |

| Gene symbol | Low risk<br>(Mean of log<br>2(RPKM)) | High risk<br>(Mean of log<br>2(RPKM)) | logFC  | P Value   | FDR   |
|-------------|--------------------------------------|---------------------------------------|--------|-----------|-------|
| TTC9B       | -1.539                               | -3.089                                | -1.550 | 1.05E-05  | 0.008 |
| CD79A       | 0.055                                | -1.479                                | -1.533 | 0.0006017 | 0.038 |
| HCST        | 4.132                                | 2.614                                 | -1.518 | 0.0009362 | 0.045 |
| CD5         | -1.081                               | -2.597                                | -1.516 | 7.82E-05  | 0.017 |
| TNFSF8      | 0.153                                | -1.358                                | -1.511 | 4.29E-06  | 0.008 |
| CXCL12      | 2.317                                | 0.814                                 | -1.503 | 4.52E-05  | 0.013 |
| CD27        | 0.423                                | -1.079                                | -1.502 | 0.0001461 | 0.022 |
| GATA3       | -0.249                               | -1.738                                | -1.489 | 6.85E-05  | 0.017 |
| PCDHB6      | -0.008                               | -1.494                                | -1.486 | 0.0006196 | 0.038 |
| DCAF8L1     | -4.717                               | -6.194                                | -1.477 | 0.0001109 | 0.020 |
| TAGLN       | 4.365                                | 2.892                                 | -1.473 | 3.53E-06  | 0.007 |
| STAP1       | -2.425                               | -3.883                                | -1.458 | 0.0011523 | 0.048 |
| CD3G        | -1.694                               | -3.146                                | -1.451 | 0.0003283 | 0.029 |
| NKG7        | 2.845                                | 1.406                                 | -1.439 | 0.000905  | 0.044 |
| VGLL3       | -1.834                               | -3.267                                | -1.432 | 0.0011448 | 0.048 |
| CD7         | 0.141                                | -1.284                                | -1.425 | 0.0003247 | 0.029 |
| MS4A4A      | 2.698                                | 1.285                                 | -1.413 | 2.59E-05  | 0.010 |
| CD52        | 3.450                                | 2.037                                 | -1.413 | 0.0005195 | 0.035 |
| LY96        | 5.671                                | 4.263                                 | -1.408 | 0.000192  | 0.024 |
| CD80        | -1.287                               | -2.683                                | -1.396 | 0.0003764 | 0.030 |
| TSTD1       | 0.582                                | -0.803                                | -1.386 | 0.0001465 | 0.022 |
| CD163       | 2.900                                | 1.537                                 | -1.363 | 8.75E-05  | 0.018 |
| FCGR3A      | 3.882                                | 2.530                                 | -1.352 | 0.0008171 | 0.043 |
| FCER1G      | 7.379                                | 6.031                                 | -1.348 | 0.0005776 | 0.037 |
| LINC02328   | 1.624                                | 0.278                                 | -1.346 | 0.0007896 | 0.042 |
| CCDC42      | -1.386                               | -2.728                                | -1.342 | 0.0009937 | 0.046 |
| TREM2       | 4.756                                | 3.420                                 | -1.336 | 0.0003369 | 0.029 |
| TMEM176B    | 4.512                                | 3.187                                 | -1.324 | 0.0001253 | 0.021 |
| FCGR1A      | 1.310                                | -0.007                                | -1.317 | 0.0002153 | 0.026 |
| TLR7        | -0.356                               | -1.670                                | -1.315 | 0.000313  | 0.029 |
| ISG15       | 7.854                                | 6.545                                 | -1.309 | 0.0012233 | 0.049 |
| PRDM16      | -3.220                               | -4.526                                | -1.305 | 0.0008337 | 0.043 |
| CD8A        | -0.501                               | -1.807                                | -1.305 | 0.0008748 | 0.044 |
| P2RY6       | 0.128                                | -1.175                                | -1.303 | 8.07E-05  | 0.018 |
| TYROBP      | 8.367                                | 7.066                                 | -1.301 | 0.000905  | 0.044 |
| CD14        | 6.284                                | 4.984                                 | -1.300 | 0.0001584 | 0.023 |
| LAX1        | -2.595                               | -3.888                                | -1.294 | 0.0006318 | 0.038 |
| C3AR1       | 3.603                                | 2.311                                 | -1.292 | 8.76E-06  | 0.008 |
| GPR65       | -0.031                               | -1.316                                | -1.285 | 1.21E-05  | 0.008 |
| S1PR4       | 0.024                                | -1.261                                | -1.285 | 0.0008748 | 0.044 |

| Gene symbol | Low risk<br>(Mean of log<br>2(RPKM)) | High risk<br>(Mean of log<br>2(RPKM)) | logFC  | P Value   | FDR   |
|-------------|--------------------------------------|---------------------------------------|--------|-----------|-------|
| APOC1       | 3.093                                | 1.816                                 | -1.278 | 0.0002236 | 0.026 |
| SERTAD4-AS1 | 2.038                                | 0.762                                 | -1.276 | 0.0007121 | 0.040 |
| APOE        | 6.398                                | 5.121                                 | -1.276 | 0.0003759 | 0.030 |
| CRYBB1      | 1.501                                | 0.228                                 | -1.273 | 0.0002411 | 0.027 |
| GPR141      | -2.063                               | -3.331                                | -1.268 | 0.000192  | 0.024 |
| TMEM176A    | 2.122                                | 0.869                                 | -1.253 | 0.0006196 | 0.038 |
| CYBB        | 3.352                                | 2.100                                 | -1.252 | 0.0001995 | 0.025 |
| NCF1C       | 1.606                                | 0.368                                 | -1.238 | 0.000905  | 0.044 |
| GPR34       | 2.966                                | 1.728                                 | -1.238 | 0.0003247 | 0.029 |
| LY86        | 3.210                                | 1.975                                 | -1.235 | 0.000192  | 0.024 |
| MNDA        | 2.297                                | 1.079                                 | -1.218 | 5.81E-05  | 0.015 |
| TNFSF13B    | 1.662                                | 0.446                                 | -1.216 | 0.0001027 | 0.019 |
| FZD2        | 3.162                                | 1.947                                 | -1.215 | 0.00028   | 0.029 |
| SMIM25      | 0.075                                | -1.140                                | -1.215 | 0.0003247 | 0.029 |
| ALDH1A1     | 1.846                                | 0.633                                 | -1.213 | 0.0007896 | 0.042 |
| CYP2S1      | 0.403                                | -0.806                                | -1.210 | 4.91E-05  | 0.013 |
| PTPRH       | -1.692                               | -2.902                                | -1.210 | 0.0010101 | 0.046 |
| SOWAHD      | 0.095                                | -1.111                                | -1.206 | 0.0007371 | 0.040 |
| LRRC25      | 2.650                                | 1.456                                 | -1.194 | 8.40E-05  | 0.018 |
| OLR1        | -0.368                               | -1.562                                | -1.194 | 0.0011834 | 0.048 |
| MRC1        | 1.667                                | 0.481                                 | -1.186 | 0.0001523 | 0.023 |
| PCED1B      | 1.009                                | -0.170                                | -1.179 | 4.71E-05  | 0.013 |
| TMEM150B    | 1.253                                | 0.082                                 | -1.171 | 0.0005013 | 0.035 |
| PTGDR       | -1.147                               | -2.317                                | -1.170 | 0.0006416 | 0.038 |
| SECTM1      | 2.485                                | 1.318                                 | -1.167 | 0.0004504 | 0.033 |
| TNFSF10     | 2.584                                | 1.419                                 | -1.165 | 0.0003016 | 0.029 |
| FPR3        | 3.516                                | 2.352                                 | -1.164 | 0.000313  | 0.029 |
| MS4A6A      | 2.191                                | 1.029                                 | -1.163 | 0.0004838 | 0.035 |
| CASTOR1     | -1.095                               | -2.247                                | -1.152 | 1.45E-05  | 0.008 |
| PODN        | 1.818                                | 0.667                                 | -1.151 | 0.0007371 | 0.040 |
| SASH3       | 2.201                                | 1.051                                 | -1.149 | 0.0001303 | 0.021 |
| VAV1        | 0.928                                | -0.215                                | -1.143 | 4.91E-05  | 0.013 |
| WAS         | 3.406                                | 2.264                                 | -1.141 | 2.59E-05  | 0.010 |
| MRVI1       | -1.099                               | -2.239                                | -1.141 | 0.0009362 | 0.045 |
| CCR5        | 0.126                                | -1.006                                | -1.132 | 0.0006878 | 0.040 |
| PCED1B-AS1  | 0.335                                | -0.796                                | -1.131 | 0.0003759 | 0.030 |
| SLAMF8      | 2.168                                | 1.044                                 | -1.124 | 0.0001409 | 0.022 |
| SH3RF3-AS1  | 1.030                                | -0.093                                | -1.124 | 0.0010015 | 0.046 |
| CD74        | 8.556                                | 7.433                                 | -1.123 | 0.0006416 | 0.038 |
| ICAM3       | -2.287                               | -3.402                                | -1.116 | 0.000978  | 0.046 |

| Gene symbol | Low risk<br>(Mean of log<br>2(RPKM)) | High risk<br>(Mean of log<br>2(RPKM)) | logFC  | P Value   | FDR   |
|-------------|--------------------------------------|---------------------------------------|--------|-----------|-------|
| LGALS2      | 2.734                                | 1.624                                 | -1.110 | 0.0012233 | 0.049 |
| IL2RG       | 1.720                                | 0.614                                 | -1.105 | 0.0005576 | 0.036 |
| LINC01503   | 2.299                                | 1.194                                 | -1.105 | 0.000905  | 0.044 |
| DAPP1       | -1.687                               | -2.787                                | -1.100 | 0.0004191 | 0.032 |
| LPAR5       | 1.557                                | 0.458                                 | -1.099 | 7.74E-05  | 0.017 |
| CD53        | 4.714                                | 3.620                                 | -1.094 | 0.0002411 | 0.027 |
| CD209       | 1.896                                | 0.809                                 | -1.087 | 0.000313  | 0.029 |
| FCGR2A      | 2.034                                | 0.950                                 | -1.083 | 0.0001465 | 0.022 |
| DACT1       | 3.124                                | 2.056                                 | -1.068 | 0.0002906 | 0.029 |
| PDCD1LG2    | 0.972                                | -0.094                                | -1.065 | 0.0011073 | 0.047 |
| C5AR1       | 3.219                                | 2.161                                 | -1.058 | 0.000313  | 0.029 |
| PYCARD      | 3.403                                | 2.346                                 | -1.057 | 0.0004668 | 0.034 |
| MS4A7       | 2.631                                | 1.584                                 | -1.047 | 0.0008748 | 0.044 |
| ITGAM       | 1.163                                | 0.119                                 | -1.045 | 0.0002322 | 0.027 |
| CD82        | 4.450                                | 3.411                                 | -1.039 | 8.75E-05  | 0.018 |
| SIGLEC9     | 1.281                                | 0.242                                 | -1.038 | 0.0007629 | 0.041 |
| PEAK3       | -0.556                               | -1.587                                | -1.031 | 0.0001409 | 0.022 |
| LGALS1      | 11.348                               | 10.320                                | -1.028 | 0.001071  | 0.046 |
| CEBPA       | 2.579                                | 1.553                                 | -1.026 | 0.000905  | 0.044 |
| C1orf162    | 2.378                                | 1.352                                 | -1.026 | 0.0007371 | 0.040 |
| PIPOX       | -0.838                               | -1.855                                | -1.017 | 0.0005195 | 0.035 |
| TLR8        | -1.474                               | -2.491                                | -1.016 | 0.0011073 | 0.047 |
| ADAP2       | 2.990                                | 1.980                                 | -1.010 | 0.0002411 | 0.027 |
| PDE1B       | -1.353                               | -2.364                                | -1.010 | 0.0005195 | 0.035 |
| SERPINE1    | 3.824                                | 2.816                                 | -1.008 | 0.0011834 | 0.048 |
| MAP3K5      | 1.083                                | 0.080                                 | -1.004 | 1.45E-05  | 0.008 |
| TYMP        | 4.173                                | 3.170                                 | -1.003 | 0.0001204 | 0.020 |
| CD37        | 1.870                                | 0.870                                 | -1.001 | 4.71E-05  | 0.013 |
| TCF7        | 0.891                                | 1.933                                 | 1.042  | 9.61E-06  | 0.008 |
| PRTG        | -1.946                               | -0.895                                | 1.051  | 0.001071  | 0.046 |
| MUC1        | -0.120                               | 0.947                                 | 1.067  | 0.0003247 | 0.029 |
| SGMS2       | 2.534                                | 3.623                                 | 1.089  | 0.0006416 | 0.038 |
| PLCB4       | 0.435                                | 1.541                                 | 1.106  | 0.0004191 | 0.032 |
| ZDHHC23     | -2.356                               | -1.209                                | 1.146  | 0.0004345 | 0.033 |
| B4GALNT1    | 0.446                                | 1.635                                 | 1.189  | 0.0002906 | 0.029 |
| DLX3        | 3.778                                | 5.126                                 | 1.348  | 0.0002322 | 0.027 |
| COL24A1     | 0.859                                | 2.207                                 | 1.349  | 0.0003759 | 0.030 |
| CGREF1      | 2.275                                | 3.708                                 | 1.433  | 0.0006643 | 0.039 |
| RHBDL2      | 3.330                                | 4.800                                 | 1.470  | 0.0001157 | 0.020 |
| COL13A1     | 1.417                                | 2.901                                 | 1.484  | 4.71E-05  | 0.013 |

| <b>Gene symbol</b> | <b>Low risk<br/>(Mean of log<br/>2(RPKM))</b> | <b>High risk<br/>(Mean of log<br/>2(RPKM))</b> | <b>logFC</b> | <b>P Value</b> | <b>FDR</b> |
|--------------------|-----------------------------------------------|------------------------------------------------|--------------|----------------|------------|
| GALNT14            | 1.626                                         | 3.183                                          | 1.556        | 0.0003016      | 0.029      |
| SP7                | 5.190                                         | 6.777                                          | 1.587        | 0.0001646      | 0.023      |
| CYFIP2             | -0.191                                        | 1.397                                          | 1.588        | 0.0006643      | 0.039      |
| INSC               | 2.754                                         | 4.402                                          | 1.648        | 0.0003247      | 0.029      |



**eTable 3.** Top 10 Most Significant Terms in GO Enrichment Analyses

| ID                   | Description                                                                                           | P.adjust               | Count |
|----------------------|-------------------------------------------------------------------------------------------------------|------------------------|-------|
| Biological processes |                                                                                                       |                        |       |
| GO:0006954           | inflammatory response                                                                                 | $1.99 \times 10^{-21}$ | 180   |
| GO:0050865           | regulation of cell activation                                                                         | $2.94 \times 10^{-20}$ | 157   |
| GO:0002694           | regulation of leukocyte activation                                                                    | $3.80 \times 10^{-20}$ | 149   |
| GO:0046649           | lymphocyte activation                                                                                 | $1.52 \times 10^{-18}$ | 175   |
| GO:0002253           | activation of immune response                                                                         | $5.15 \times 10^{-17}$ | 158   |
| GO:0002250           | adaptive immune response                                                                              | $5.02 \times 10^{-16}$ | 111   |
| GO:0042110           | T cell activation                                                                                     | $2.51 \times 10^{-15}$ | 130   |
| GO:0002696           | positive regulation of leukocyte activation                                                           | $4.35 \times 10^{-15}$ | 95    |
| GO:0050867           | positive regulation of cell activation                                                                | $4.45 \times 10^{-15}$ | 97    |
| GO:0051249           | regulation of lymphocyte activation                                                                   | $2.13 \times 10^{-14}$ | 119   |
| Molecular functions  |                                                                                                       |                        |       |
| GO:0004888           | transmembrane signaling receptor activity                                                             | $5.71 \times 10^{-9}$  | 132   |
| GO:0038187           | pattern recognition receptor activity                                                                 | $9.80 \times 10^{-6}$  | 13    |
| GO:0008329           | signaling pattern recognition receptor activity                                                       | $3.04 \times 10^{-5}$  | 12    |
| GO:0005125           | cytokine activity                                                                                     | $7.24 \times 10^{-5}$  | 39    |
| GO:0048018           | receptor ligand activity                                                                              | $2.48 \times 10^{-4}$  | 73    |
| GO:0004930           | G protein-coupled receptor activity                                                                   | $5.72 \times 10^{-4}$  | 60    |
| GO:0005126           | cytokine receptor binding                                                                             | $6.29 \times 10^{-4}$  | 51    |
| GO:0004896           | cytokine receptor activity                                                                            | $6.29 \times 10^{-4}$  | 22    |
| GO:0030545           | receptor regulator activity                                                                           | $6.29 \times 10^{-4}$  | 74    |
| GO:0016705           | oxidoreductase activity, acting on paired donors, with incorporation or reduction of molecular oxygen | $1.05 \times 10^{-3}$  | 34    |
| Cellular components  |                                                                                                       |                        |       |
| GO:0009897           | external side of plasma membrane                                                                      | $1.04 \times 10^{-9}$  | 61    |
| GO:0009986           | cell surface                                                                                          | $1.04 \times 10^{-9}$  | 143   |
| GO:0098552           | side of membrane                                                                                      | $2.90 \times 10^{-7}$  | 85    |
| GO:0045121           | membrane raft                                                                                         | $8.77 \times 10^{-6}$  | 76    |
| GO:0098857           | membrane microdomain                                                                                  | $8.77 \times 10^{-6}$  | 76    |
| GO:0098589           | membrane region                                                                                       | $1.65 \times 10^{-5}$  | 77    |
| GO:0043235           | receptor complex                                                                                      | $2.58 \times 10^{-4}$  | 63    |
| GO:0072562           | blood microparticle                                                                                   | $3.96 \times 10^{-4}$  | 28    |
| GO:0030667           | secretory granule membrane                                                                            | $4.55 \times 10^{-4}$  | 66    |
| GO:0098802           | plasma membrane receptor complex                                                                      | $4.55 \times 10^{-4}$  | 40    |

**eFigure 1.** Overall Survival According to the Risk Score in Patients With Osteosarcoma

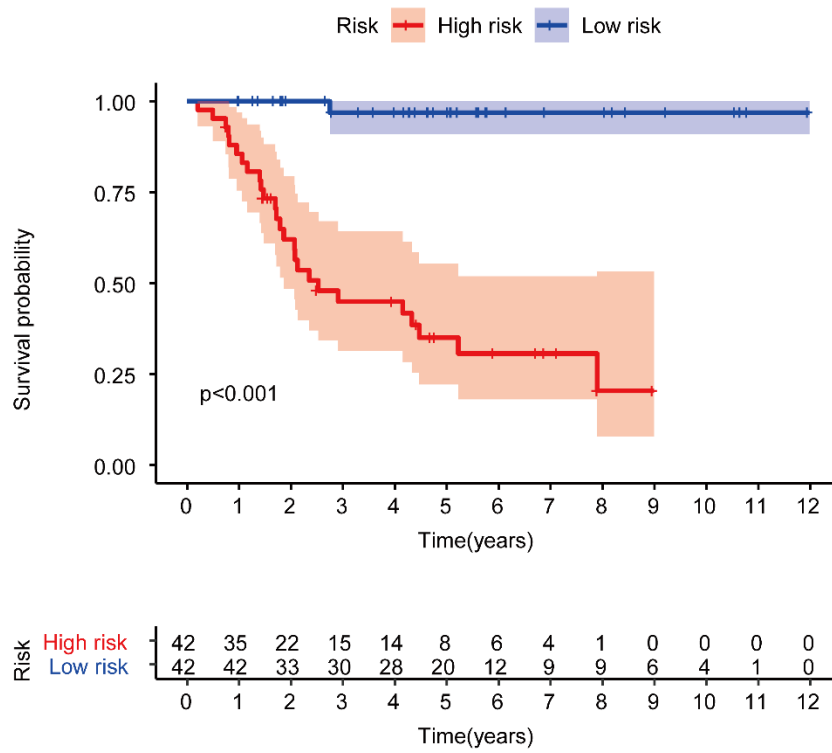

**eFigure 2.** Volcano Plot and Heatmap of DEGs Between Groups

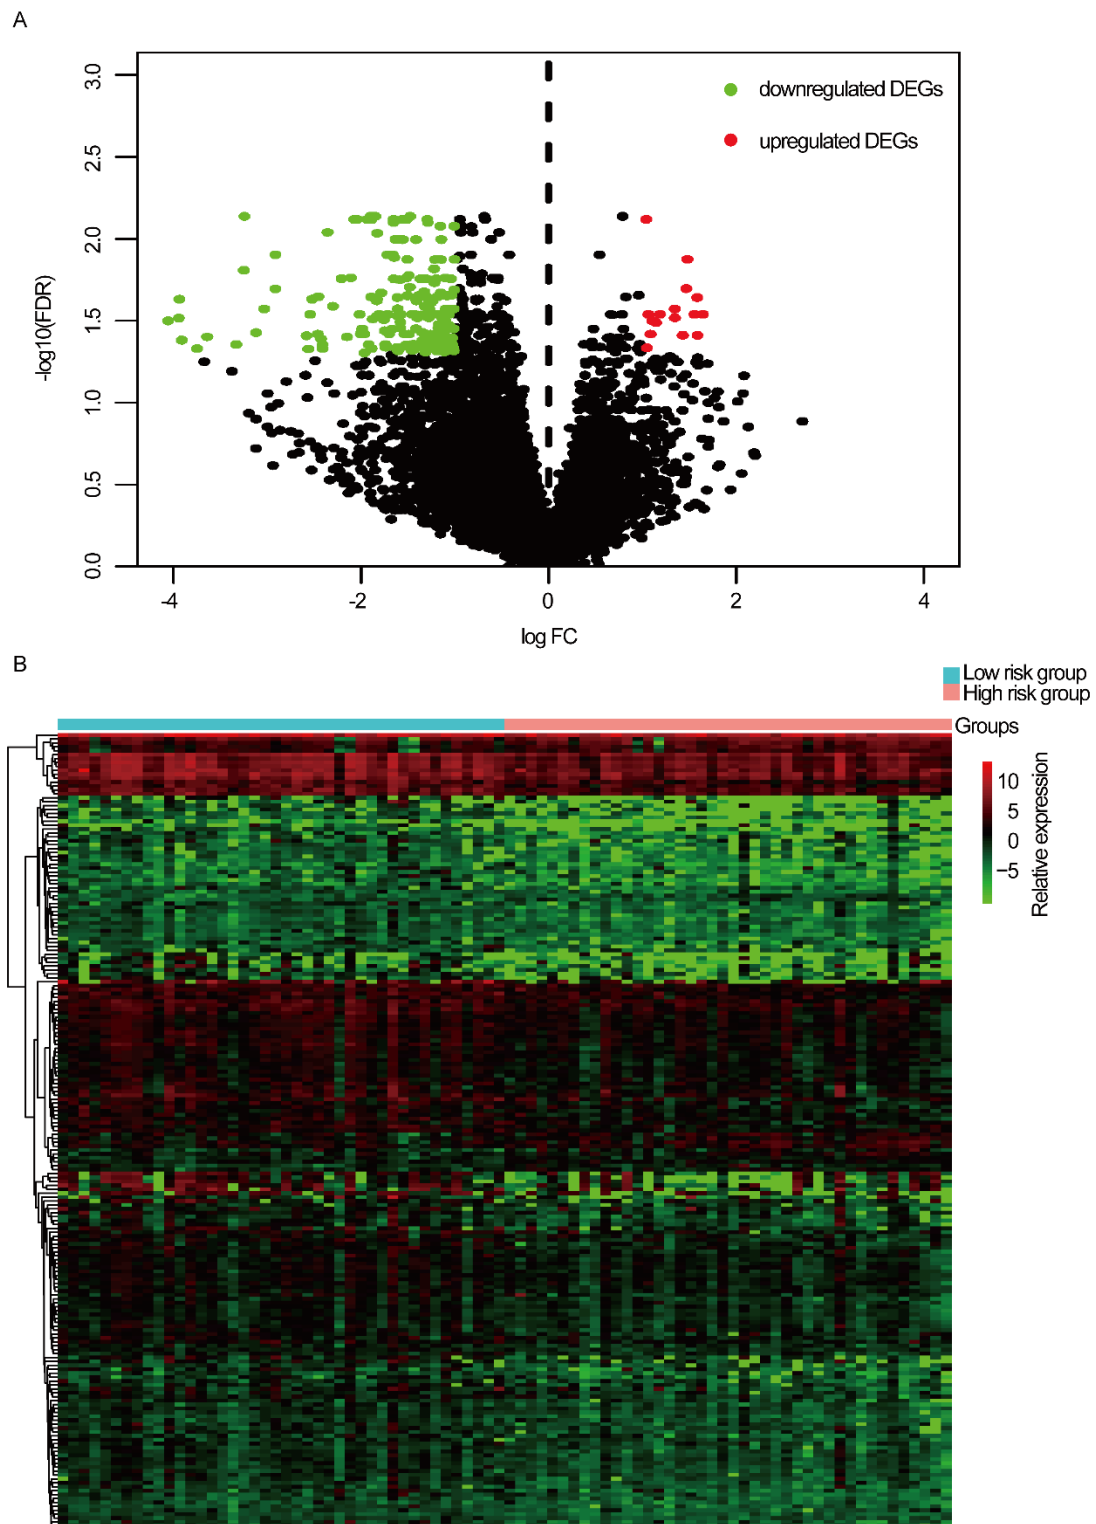

(A) Volcano plot. Red dots represent significantly upregulated DEGs in high risk group, while green dots represent significantly downregulated DEGs. (B) Heatmap. There were notable differences between the two groups according to their gene expression signatures.

**eFigure 3.** KEGG Pathway Enrichment Analyses: the Enriched KEGG Signaling Pathways From the DEGs

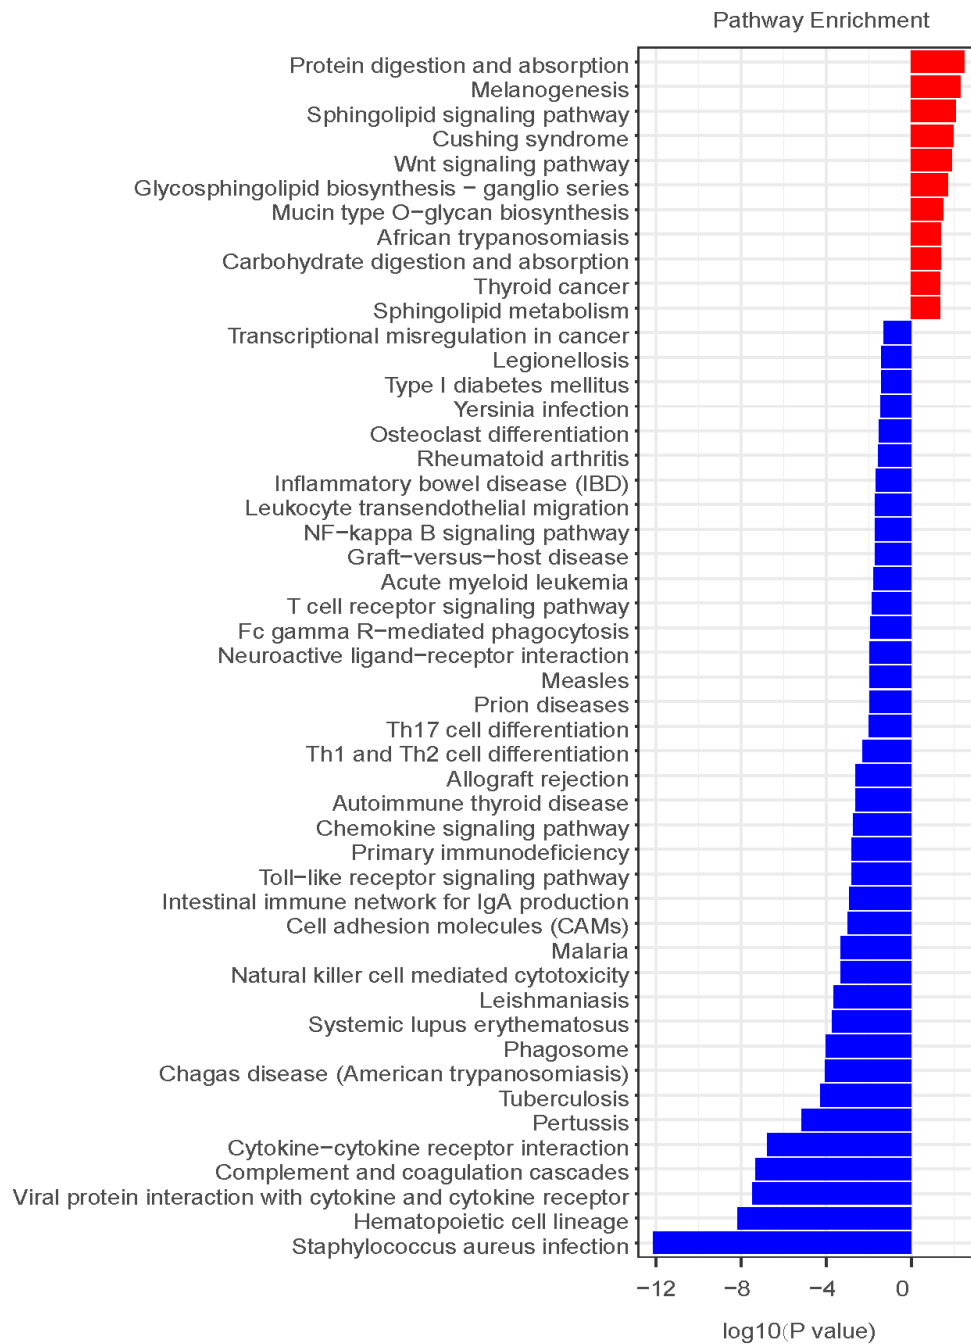

**eFigure 4. TFs and IRGs Associations**

A

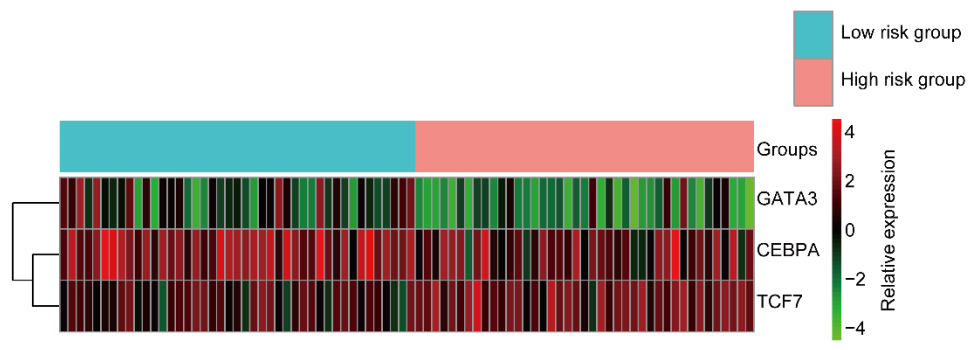

B

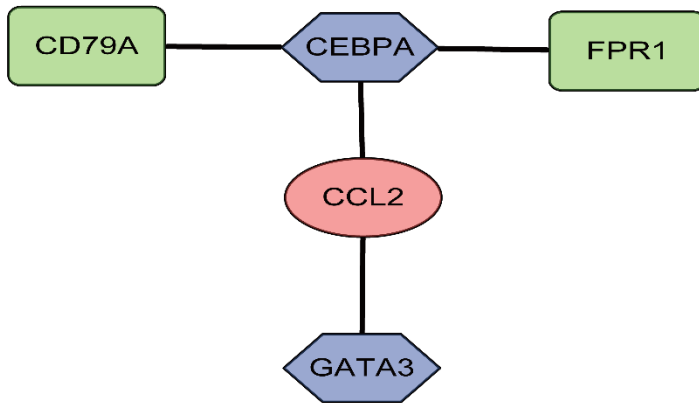

(A) Heatmap of differentially expressed TFs between two groups. (B) TFs-IRGs interaction network. Blue hexagon: TFs; green round rectangle: low risk IRGs; red ellipse: high risk IRGs.
